# Supplementary material for: Selective hydrogenation of acetylene on the PdLa@N-doped biochar catalyst surface: the evolution of active sites, catalytic performance, and mechanism
Source: Royal Society of Chemistry journal article supplement (doi:10.1039/d0nj04401f), 2020-01-01
Supplement: d0nj04401f1.pdf [file d0nj04401f1.pdf]

Table S1

| Entry | Catalyst                           | Pd loading, % | T (°C)  | Conversion, % | Selectivity, % | Reference                   |
|-------|------------------------------------|---------------|---------|---------------|----------------|-----------------------------|
| 1     | Pd/Al <sub>2</sub> O <sub>3</sub>  | 3             | 130     | 100           | 26             | Huang et.al <sup>1</sup>    |
| 2     | Pd/Ni(OH) <sub>2</sub>             |               | 105     | 80            | 80             | Hu et.al <sup>2</sup>       |
| 3     | Pd/ZnO SAC                         | 1             | 80      | >99           | 80             | Zhou et.al <sup>3</sup>     |
| 4     | Pd <sub>4</sub> S                  |               | 50      | 100           | 60             | Liu et.al <sup>4</sup>      |
| 5     | Pd <sub>2</sub> F/ fiberglass      |               | 370     | 51            | 100            | Gulyaeva et.al <sup>5</sup> |
| 6     | PdP <sub>2</sub> /TiO <sub>2</sub> | 2             | 225     | >99           | 82             | Liu et.al <sup>6</sup>      |
| 7     | AgPd/SiO <sub>2</sub>              | 0.5           | 240-280 | > 99          | 60-90          | Pei et.al <sup>7</sup>      |
| 8     | PdZn                               |               | 60      | >90           | 100            | Shao et.al <sup>8</sup>     |
| 9     | Pd/Cu(111)                         |               | 225     | 100           | 85             | Liu et.al <sup>6</sup>      |
| 10    | Pd-Ag/Mg-Ti                        | 1             | 70      | >99           | >99            | Liu et.al <sup>9</sup>      |
| 11    | PdLa/N-pgBC                        | 0.25(Pd/La=1) | 240     | 100           | >94.2          | This work                   |

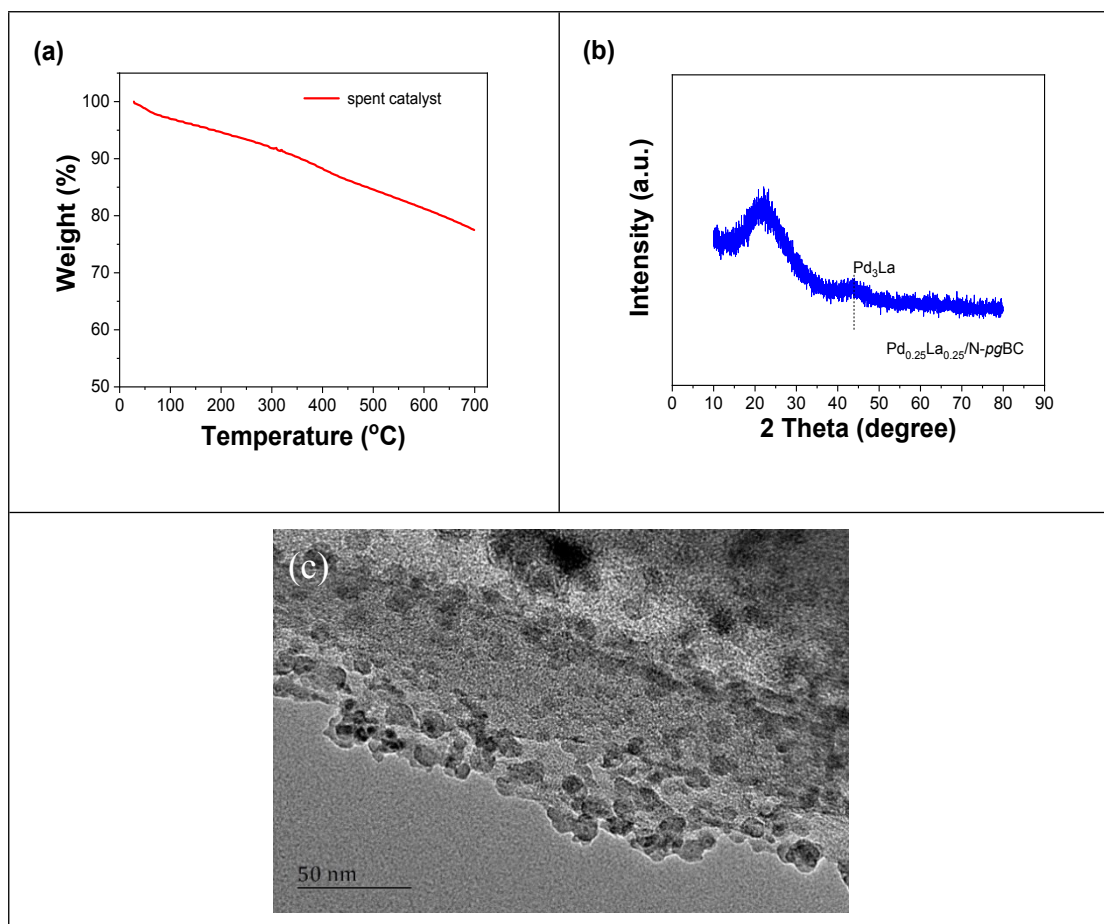

Fig. S1. TG(a), XRD(b), and TEM images(c) of the spent catalyst.

References:

1. X. Huang, Y. Xia, Y. Cao, X. Zheng, H. Pan, J. Zhu, C. Ma, H. Wang, J. Li and R. You, *Nano Research*, 2017, 10, 1-11.
2. M. Hu, J. Zhang, W. Zhu, Z. Chen, X. Gao, X. Du, J. Wan, K. Zhou, C. Chen and Y. Li, *Nano Research*, 2018, 11, 905-912.
3. Huiran, Zhou, Xiaofeng, Yang, Aiqin, Wang, Shu, Miao, Xiaoyan and Liu, *Chinese Journal of Catalysis*, 2016.
4. L. Yanan, A. J. Mccue, F. Junting, G. Shaoliang, L. Dianqing and J. A. Anderson, *Journal of Catalysis*, 2018, 364, 204-215.
5. Y. K. Gulyaeva, V. V. Kaichev, V. I. Zaikovskii, E. V. Kovalyov, A. P. Suknev and B. S. Bal'zhinimaev, *Catalysis Today*, 2015, 245, 139-146.
6. L. Yanan, A. J. Mccue, M. Chenglin, F. Junting, L. Dianqing and J. A. Anderson, *Journal of Catalysis*, 2018, 364, 406-414.
7. G. X. Pei, X. Y. Liu, A. Wang, A. F. Lee, M. A. Isaacs, L. Li, X. Pan, X. Yang, X. Wang, Z. Tai, K. Wilson and T. Zhang, *Acs Catalysis*, 2015, 5, 3717-3725.
8. H. Zhou, X. Yang, L. Li, X. Liu, Y. Huang, X. Pan, A. Wang, J. Li and T. Zhang, *Acs Catalysis*, 2016.
9. Y. Liu, J. Zhao, Y. He, J. Feng, T. Wu and D. Li, *Journal of Catalysis*, 2017, 348, 135-145.
